# Supplementary material for: Hyaluronic acid/serotonin-decorated cerium dioxide nanomedicine for targeted treatment of ulcerative colitis
Source: Royal Society of Chemistry journal article supplement (doi:10.1039/d2bm01256a), 2022-11-29
Supplement: d2bm01256a1.pdf [file d2bm01256a1.pdf]

## Supplementary Information

### Hyaluronic acid/serotonin-decorated cerium dioxide nanomedicine for targeted treatment of ulcerative colitis

Yanyao Gao<sup>2#</sup>, Jing Zou<sup>1#</sup>, Bo Chen<sup>1</sup>, Yuhao Cao<sup>1</sup>, Datao Hu<sup>1</sup>, Yuchen Zhang<sup>1</sup>, Xinxin Zhao<sup>1</sup>, Jinpeng Wen<sup>1</sup>, Kailai Liu<sup>1</sup>, Ke Wang<sup>1, 3\*</sup>

### Supplementary Figures

5-HT

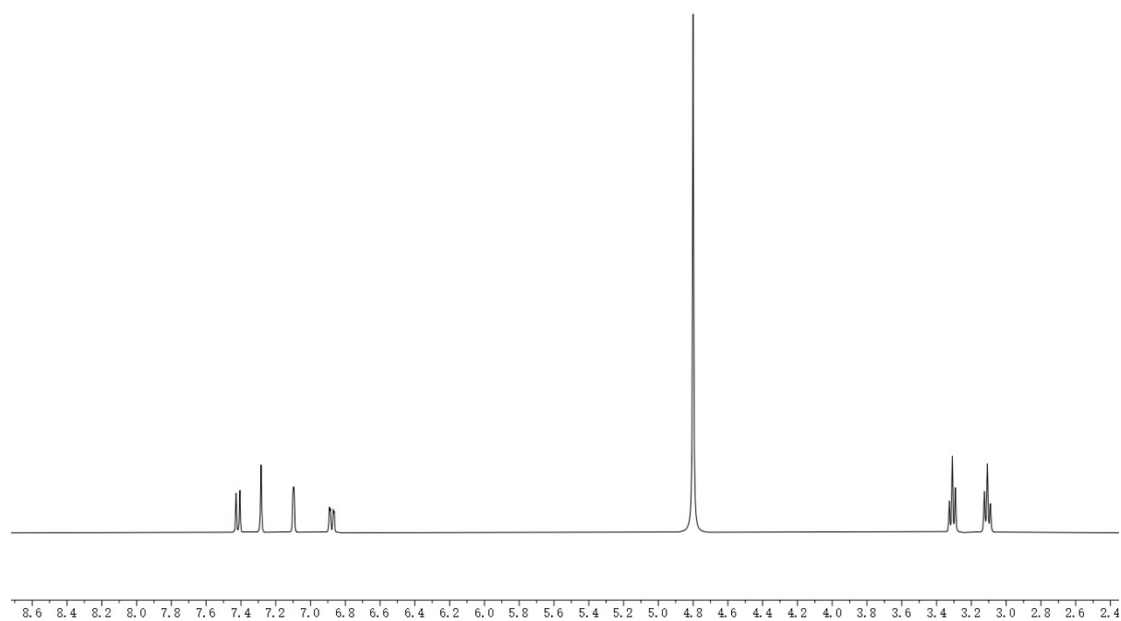

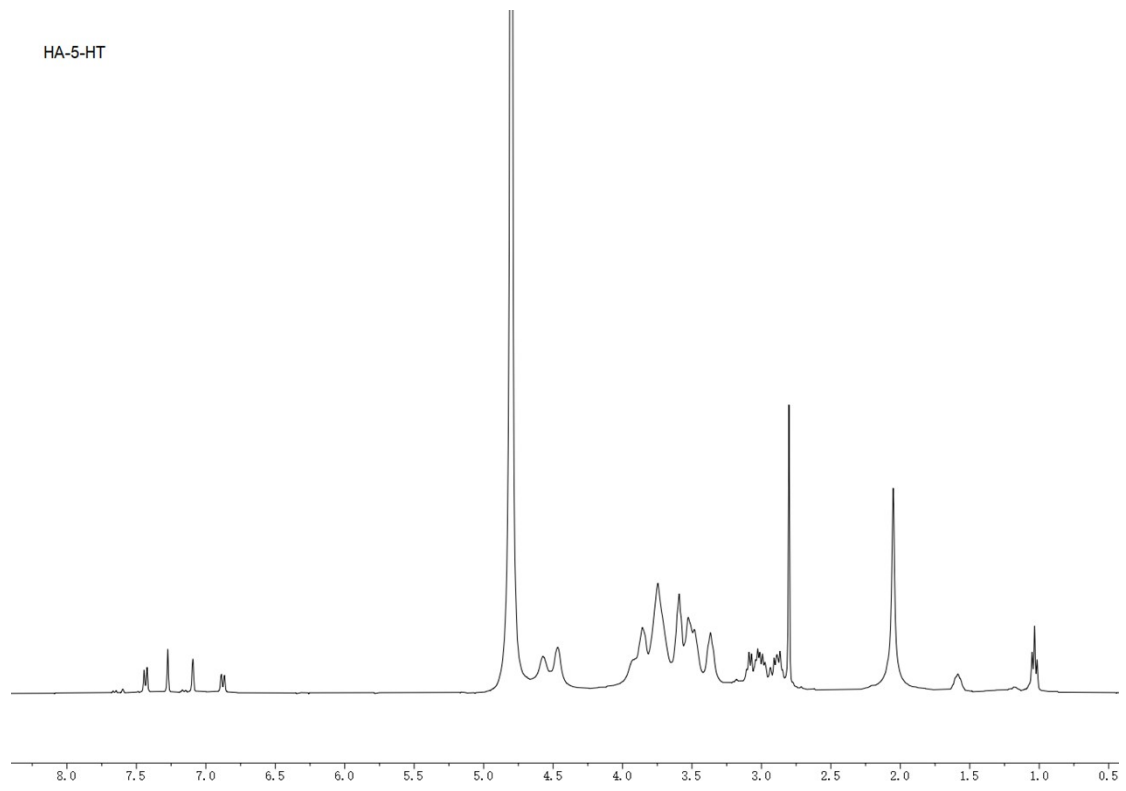

**Supplementary Figure 1.** <sup>1</sup>H-NMR spectra of the 5-HT and HA-5-HT.
